# Supplementary material for: Detection of Glial Fibrillary Acidic Protein in Patient Plasma Using On-Chip Graphene Field-Effect Biosensors, in Comparison with ELISA and Single-Molecule Array
Source: PubMed Central journal article supplement (PMC8805154; doi:10.1021/acssensors.1c02232), 2021-12-15
Supplement: se1c02232_si_001.pdf [file se1c02232_si_001.pdf]

## Supplementary Information

# Detection of Glial Fibrillary Acidic Protein in Patient Plasma using On-chip Graphene Field-effect Biosensors, in Comparison with ELISA and Single Molecule Array

*Lizhou Xu<sup>1, #</sup>, Sami Ramadan<sup>1, #</sup>, Oluwatomi E. Akingbade<sup>2, 3</sup>, Yuanzhou Zhang<sup>1</sup>, Sarah Alodan<sup>1</sup>, Neil Graham<sup>2, 3</sup>, Karl A. Zimmerman<sup>2, 3</sup>, Elias Torres<sup>4</sup>, Amanda Heslegrave<sup>5, 6</sup>, Peter K. Petrov<sup>1</sup>, Henrik Zetterberg<sup>5, 6, 7, 8, 9</sup>, David J. Sharp<sup>2, 3</sup>, Norbert Klein<sup>1, \*</sup>, Bing Li<sup>2, 3, \*</sup>*

<sup>1</sup> Department of Materials, Imperial College London, London, SW7 2AZ, UK

<sup>2</sup> Department of Brain Sciences, Imperial College London, W12 0BZ, UK

<sup>3</sup> Care Research & Technology Centre, UK Dementia Research Institute, W12 0BZ, UK

<sup>4</sup> Graphenea Semiconductor, Paseo Mikeletegi 83, San Sebastián, 20009, Spain

<sup>5</sup> UK Dementia Research Institute at UCL, University College London, London, WC1E 6BT, UK

<sup>6</sup> Department of Neurodegenerative Disease, UCL Institute of Neurology, London, WC1E 6BT, UK

<sup>7</sup> Department of Psychiatry and Neurochemistry, Institute of Neuroscience and Physiology, the Sahlgrenska Academy at the University of Gothenburg, Mölndal, 43141, Sweden

<sup>8</sup> Clinical Neurochemistry Laboratory, Sahlgrenska University Hospital, Mölndal, 43141, Sweden

<sup>9</sup> Hong Kong Centre for Neurodegenerative Diseases, Hong Kong, 999077, China

# These authors contributed equally.

\* Corresponding authors:

Prof. Dr. Norbert Klein, [n.klein@imperial.ac.uk](mailto:n.klein@imperial.ac.uk)

Dr. Bing Li, [b.li@imperial.ac.uk](mailto:b.li@imperial.ac.uk)

### **Sandwich ELISA Detection of GFAP**

Sandwich ELISA was performed using the Human GFAP Matched Antibody Pair Kit (Abcam, Cambridge UK) containing capture antibody (rabbit monoclonal anti-GFAP antibody), biotinylated detector antibody (rabbit monoclonal anti-GFAP antibody) and purified human GFAP protein as the standard. Blocking buffer, streptavidin conjugated horse radish peroxidase solution (HRP), 3,3',5,5'-tetramethylbenzidine (TMB) solution and stop solution (containing sulfuric acid) were purchased from Abcam, Cambridge (UK). Reagents were diluted to working concentration in blocking buffer containing 1% BSA and 0.05% Tween20. PBS-Tween 20 (0.05%) solution was used as a wash buffer in this procedure. All incubations occurred at room temperature (RT) (20-25°C) on the Heidolph™ Titramax 1000 orbital plate shaker (400 rpm) (Fisher Scientific, Leicestershire, UK).

Briefly, all reagents were bought to RT before use. The Nunc MaxiSorp™ flat-bottom 96-well plates (Life Science Technologies, MA, USA) were coated with anti-GFAP capture antibody and incubated for 120 min. After incubation, the wells were washed with blocking buffer for 120 min to prevent non-specific binding. Wells were washed with the wash buffer before the addition of standard samples or clinical plasma samples. Purified human GFAP standard

protein was used to validate antibody-antigen binding. Purified human GFAP protein was diluted to 2000 pg/mL and then serially diluted (two-fold) in blocking buffer to create a standard curve. Plasma samples were thawed at RT for 30 min and then serially diluted (two-fold) in blocking buffer. If required (based on concentration determined by Simoa), plasma samples were diluted to 2000 pg/mL (the upper detection limit of the assay) prior to serial dilution. Blocking buffer was used as a blank control for standards and plasma samples. Standard protein dilutions, plasma samples and blocking buffer were added to wells in duplicate and plates were incubated for 120 min. After incubation, plates were washed with wash buffer and then incubated with biotinylated anti-GFAP detector antibody for 60 min. Wells were washed with wash buffer before the addition of a streptavidin conjugated HRP solution for 60 min. The plates were washed for the final time and then plates were incubated with TMB solution in the dark for 20 min to allow for quantification of the immobilised (detector) antibody-complexes. Finally, stop solution was added to wells and incubated for 1 min. The absorbance of each sample and standard was immediately read at 450 nm wavelength using a Varioskan Lux Multimode microplate reader (Thermo Fisher Scientific, Dartford, UK) with SkanIt Software for Microplate Readers, Table S1. GFAP standard protein and plasma samples were tested in duplicate.

**Table S1.** Detection of GFAP in seven clinical human plasma samples (one healthy control, PS0, and six patients, PS1 - PS6) using ELISA

| Sample No | GFAP concentration (pg/mL) |           |      | CV%  | P value | 95% CI (pg/mL) |             | LOD (pg/mL) |
|-----------|----------------------------|-----------|------|------|---------|----------------|-------------|-------------|
|           | Test 1                     | Test 2    | Mean |      |         | Upper limit    | Lower limit |             |
| PS0       | Below LOD                  | Below LOD | N/A  | N/A  | N/A     | N/A            | N/A         | 14.7        |
| PS1       | Below LOD                  | Below LOD | N/A  | N/A  | N/A     | N/A            | N/A         | 19.3        |
| PS2       | 94                         | 83        | 88   | 15.9 | 0.0002  | 69             | 108         | 18.7        |
| PS3       | 217                        | 180       | 198  | 3.9  | 0.0007  | 175            | 222         | 19.3        |
| PS4       | 746                        | 611       | 678  | 13.8 | <0.0001 | 585            | 772         | 19.3        |
| PS5       | 21745                      | 1949      | 2061 | 20.9 | 0.0037  | 1272           | 2851        | 14.7        |
| PS6       | 6790                       | 5019      | 5905 | 3.3  | <0.0001 | 5544           | 6265        | 26.6        |

**Note:** Mean GFAP detection and resulting coefficient of variation (CV%), significant

difference from control sample (p value, calculated from one sample t-test), 95% confidence interval (lower limit and upper limit) (95% CI), and the limit of detection (LOD), pg/mL, of all seven samples measured by ELISA. N/A refers to instances in which calculations are not applicable as not calculated due to GFAP concentration being below the readable limit of the assay. All samples were measured in duplicate.

The mean +/- standard deviation (SD) average density of duplicate readings of serial dilutions of the GFAP standard protein were fitted using a four-parameter logistic curve:

$$y = y^0 + \left( \frac{A}{w \sqrt{\pi/2}} \right) \left( \exp^{-2 \left( \frac{x-xc}{w} \right)^2} \right) \quad S1$$

Where  $y^0$  is the baseline offset value,  $xc$  is the centre of the peak,  $w$  is equal to 2 times the standard deviation of the Gaussian distribution of the curve and  $A$  is the area under the curve. Unknown GFAP concentrations from clinical samples were extrapolated from the four-parameter logistic curve derived from the GFAP protein standard (Fig. S1) and the averages calculated to give the final GFAP concentration of PS2-PS6.

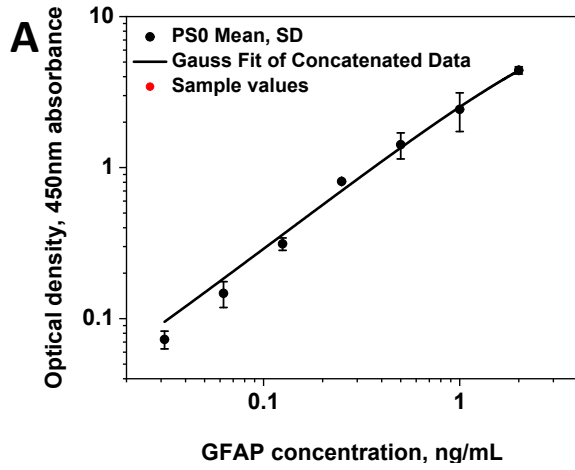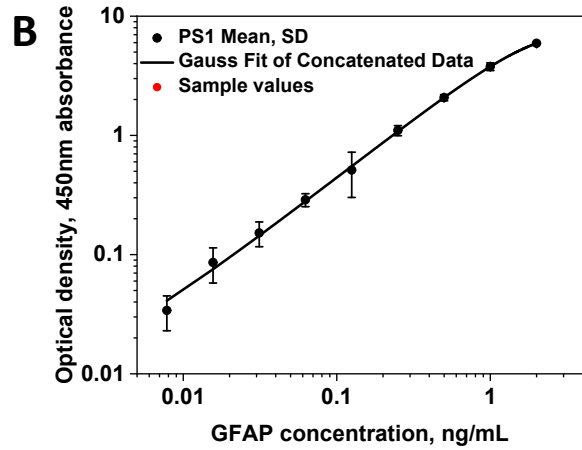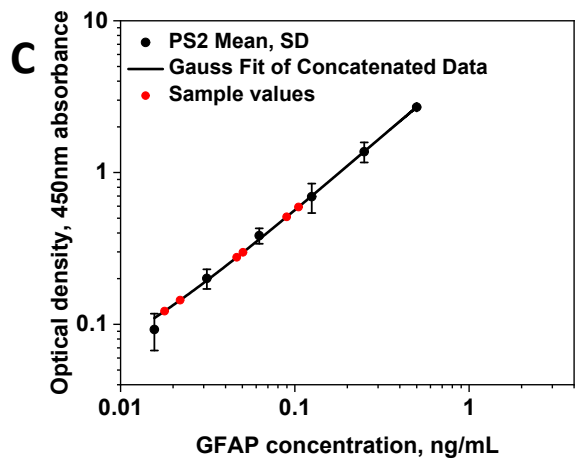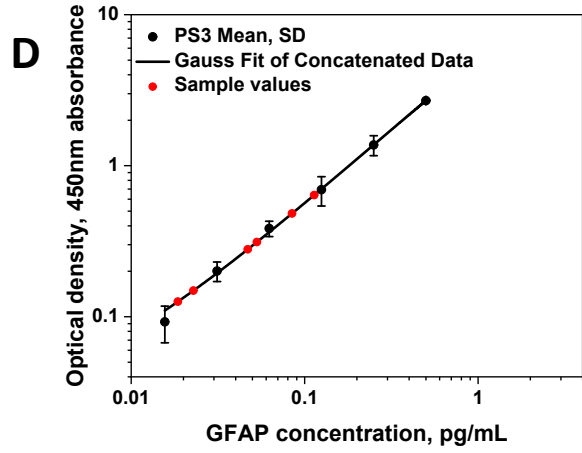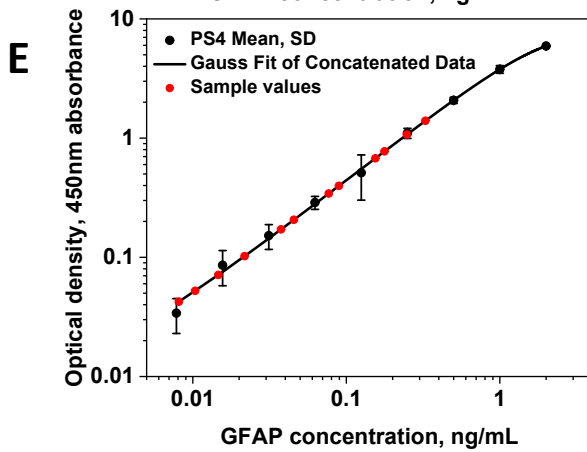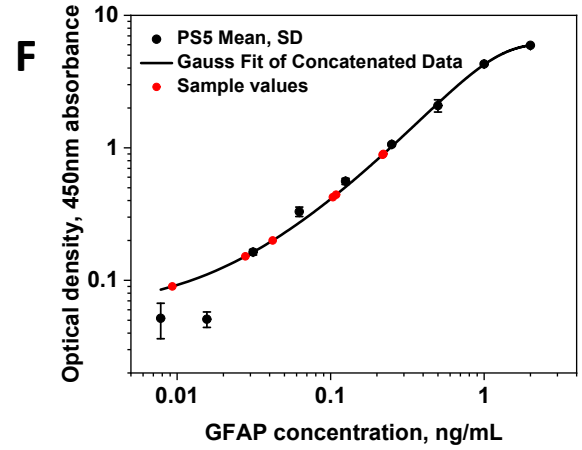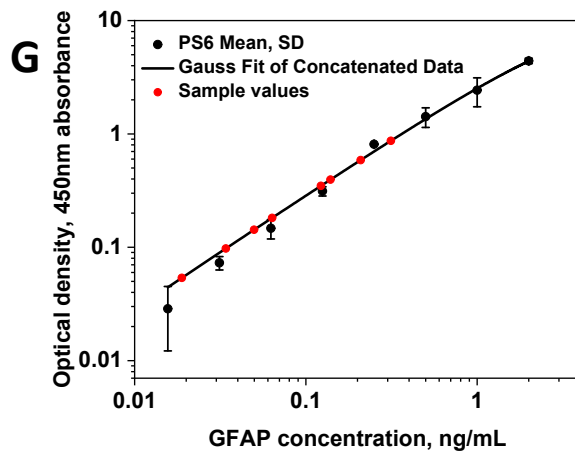

Figure S1. Detection of GFAP in six clinical plasma samples and one healthy control using ELISA method. The optical density of serial dilutions of samples PS0, N=0 (A); PS1, N=0 (B); PS2, N=5 (C); PS3, N=3 (D); PS4, N=7 (E); PS5, N=4 (F); PS6, N=4 (G) was compared to the optical density of the standard (GFAP in buffer). Standard curves were established using known concentrations of GFAP in buffer fitted with a four-parameter logistic curve. GFAP in samples PS0 and PS1 were below the detectable limit of the assay. All concentrations were measured in duplicate.

### Raman characterisation of functionalisation process

Raman spectroscopy measurements were performed using a Witec spectrometer with laser wavelength of 532 nm (excitation energy  $E_L = \hbar\omega_L = 2.33$  eV) through an optical fiber, and an objective lens of 100 $\times$ , NA = 0.8, and laser spot of 0.4  $\mu\text{m}$ . The laser power was kept below 2 mW and spectral resolution was  $\sim 3$   $\text{cm}^{-1}$ ; the Raman peak position was calibrated based on the Si peak position at 520.7  $\text{cm}^{-1}$ . The D, G, and 2D peaks were fitted with Lorentzian functions. Fig. S2. Shows  $I_D/I_G$  ratio before and after functionalisation of graphene with PBASE. An increase of the  $I_D/I_G$  is observed after graphene modification with PBASE which can confirm the presence of PBASE (see manuscript section 3.3).

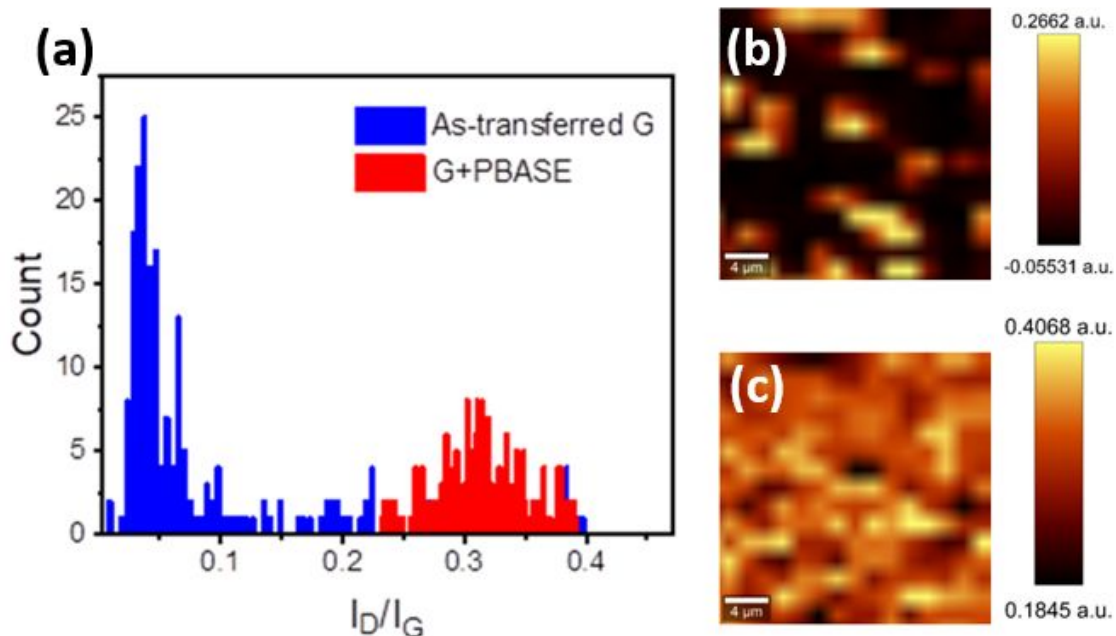

Figure S2. Comparison of Raman  $I_D/I_G$  intensity ratio between as-transferred graphene and graphene functionalised with 10 mM PBASE. (a) Histogram shows the  $I_D/I_G$  ratio for as-transferred graphene and graphene after functionalisation with PBASE. The statistics shows an increase in  $I_D/I_G$  after modification of graphene with PBASE. (b) Raman map of  $I_D/I_G$  for as-transferred graphene. (c) Raman map of  $I_D/I_G$  for PBASE modified graphene.

### XPS characterisation of functionalisation process

XPS experiments and measurements were performed with K-Alpha+ and an Al radiation source ( $h\nu = 1486.6$  eV) in an ultrahigh vacuum chamber for spectroscopic analysis with a base pressure of  $5 \times 10^{-8}$  mbar. XPS is used to confirm the presence of PBASE and Ab on graphene surface (See manuscript section 3.3). High resolution C 1s spectra show higher intensity peaks at C–C at 284.8 eV, C–O/C–N at 286, and O–C=O at 288 eV after incubation of Ab due to the large number of amine and amide groups present on the antibodies.

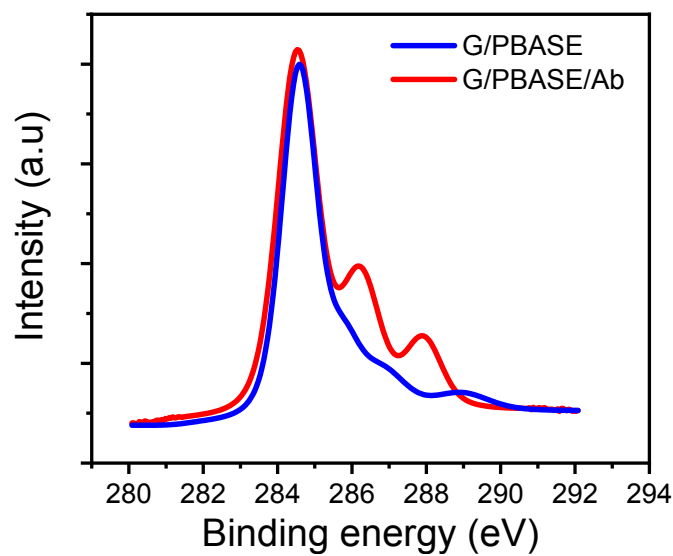

Figure S3. C 1s XPS spectra of graphene with PBASE, and with PBASE + GFAP antibody.

### Fitting the shift in Dirac voltage as a function of GFAP concentration

Sips model was used to fit the GFET response and is given by:

$$\Delta V_{DV} = V_{Max} \frac{\left(\frac{C}{K_D}\right)^a}{1 + \left(\frac{C}{K_D}\right)^a} \quad S2$$

Where  $V_{Max}$  is the maximum in Dirac voltage with all antibody sites are occupied,  $c$  is the GFAP concentration,  $a$  is the characteristics of distribution function, and  $K_D$  is the dissociation constant. The fitting parameter values  $V_{Max}=0.1$  V, and average  $K_D= 1.88$  ng/mL.

## Comparison of the detection results by Simoa, ELISA and GFET

**Table S2.** Comparison of the detection results for GFAP in patient samples by three methods: Simoa, ELISA and GFET

| Sample     | Conc. by Simoa   |                                      | Conc. By ELISA   |                                             | Conc. By GFET    |
|------------|------------------|--------------------------------------|------------------|---------------------------------------------|------------------|
|            | Measured results | Samples for GFET (diluted 100 times) | Measured results | Normalised concentration (dilute 100 times) | Measured results |
| <b>PS0</b> | 0                | 0                                    | 0                | 0                                           | 0                |
| <b>PS1</b> | 36               | 0.36                                 | 0                | 0                                           | 0                |
| <b>PS2</b> | 1807             | 18                                   | 88               | 0.88                                        | 17               |
| <b>PS3</b> | 4345             | 43                                   | 198              | 1.98                                        | 53               |
| <b>PS4</b> | 10108            | 101                                  | 678              | 6.78                                        | 124              |
| <b>PS5</b> | 23094            | 230                                  | 2061             | 20.61                                       | 232              |
| <b>PS6</b> | 56424            | 564                                  | 5904             | 59.04                                       | 588              |
